# Supplementary material for: Spread of hospital-acquired infections: A comparison of healthcare networks
Source: PLOS journal article supplement (doi:10.1371/journal.pcbi.1005666), 2017-08-24
Supplement: S21 (10.1371/journal.pcbi.1005666.s021) [file journal.pcbi.1005666.s021]

**S1 Table. Network Characteristics of the Erdos-Renyi Random Networks**

| Network Topology Measures     | HAI-Specific Network | 100 HAI-Specific-like ER networks |                 |         | Suspected-HAI Network | 100 Suspected-HAI-like ER networks |                 |         | General Network | 100 General Network-like networks |                 |         |
|-------------------------------|----------------------|-----------------------------------|-----------------|---------|-----------------------|------------------------------------|-----------------|---------|-----------------|-----------------------------------|-----------------|---------|
|                               | Value                | Mean                              | 95% CI          | P-value | Value                 | Mean                               | 95% CI          | P-value | Value           | Mean                              | 95% CI          | P-value |
| Average Degree                | 5.88                 | 5.88                              | 5.88-5.88       | 1       | 19.05                 | 19.05                              | 19.05-19.05     | 1       | 48.50           | 48.50                             | 48.50-48.50     | 1       |
| Diameter                      | 47                   | 37.31                             | 36.64-37.98     | <0.001  | 64                    | 27.83                              | 27.43-28.23     | <0.001  | 30              | 49.87                             | 49.69-50.05     | <0.001  |
| Average Path Length           | 5.23                 | 6.55                              | 6.54-6.56       | <0.001  | 3.63                  | 3.618                              | 3.618-3.619     | <0.001  | 2.99            | 2.735                             | 2.735-2.735     | <0.001  |
| Global Clustering Coefficient | 0.08                 | 0.0047                            | 0.0045-0.0048   | <0.001  | 0.16                  | 0.0096                             | 0.0095-0.0097   | <0.001  | 0.23            | 0.02337                           | 0.02334-0.0234  | <0.001  |
| Density                       | 0.002                | 0.002                             | 0.002-0.002     | 1       | 0.005                 | 0.0048                             | 1975-1975       | 1       | 0.012           | 0.012                             | 0.012-0.012     | 1       |
| Average Edge Betweenness      | 1556.94              | 3143.72                           | 3128.89-3158.55 | <0.001  | 852.23                | 989.39                             | 988.07-990.70   | <0.001  | 301.27          | 252.81                            | 252.75-252.88   | <0.001  |
| Average Total Closeness       | 3.2e-5               | 9.3e-5                            | 8.9e-5-9.7e-5   | <0.001  | 7.4e-5                | 5.8e-5                             | 5.79e-5-5.81e-5 | <0.001  | 1.6e-4          | 1.89e-5                           | 1.89e-5-1.90e-5 | <0.001  |

**S1 Table.** Comparison of the healthcare network topology measures with the average measures of 100 simulated Erdos-Renyi (ER) networks that are parameterized with same number of nodes, edges, and Poisson-distributed average edge weight. For each measure, a t-test is conducted to compare the difference between the health network value and the average values of the ER networks with given 95% confidence intervals and p-values.
